# Supplementary material for: Landslide Susceptibility Modeling Using Remote Sensing Data and Random SubSpace-Based Functional Tree Classifier
Source: MDPI journal article supplement (doi:10.3390/rs14194803), 2022-09-26
Supplement: s1 [file s1]

## Supplementary

**Table S1.** Relevance level of each class of each factor by frequency ratio (FR)

| <b>Landslide conditioning factors</b> | <b>Classes</b> | <b>FR value</b> |
|---------------------------------------|----------------|-----------------|
| <b>Aspect</b>                         | Flat           | <b>0.000</b>    |
|                                       | North          | <b>1.133</b>    |
|                                       | Northeast      | <b>1.123</b>    |
|                                       | East           | <b>0.846</b>    |
|                                       | Southeast      | <b>0.797</b>    |
|                                       | South          | <b>1.537</b>    |
|                                       | Southwest      | <b>1.157</b>    |
|                                       | West           | <b>0.876</b>    |
|                                       | Northwest      | <b>0.677</b>    |
| <b>Slope (°)</b>                      | <10            | <b>3.534</b>    |
|                                       | 10-20          | <b>1.375</b>    |
|                                       | 20-30          | <b>0.757</b>    |
|                                       | 30-40          | <b>0.856</b>    |
|                                       | 40-50          | <b>0.823</b>    |
|                                       | 50-60          | <b>0.378</b>    |
|                                       | 60-70          | <b>0.000</b>    |
|                                       | 70-80          | <b>0.000</b>    |
|                                       | >80            | <b>0.000</b>    |
| <b>Profile curvature</b>              | -44.22 - -2.24 | <b>0.389</b>    |
|                                       | -2.24 - -0.80  | <b>0.560</b>    |
|                                       | -0.80 - 0.28   | <b>1.143</b>    |
|                                       | 0.28 - 1.73    | <b>1.235</b>    |
|                                       | 1.73 - 48.04   | <b>0.711</b>    |
|                                       | -32.95 - -1.7  | <b>0.422</b>    |
| <b>Plan curvature</b>                 | -1.70 - -0.65  | <b>0.876</b>    |
|                                       | -0.65 - 0.14   | <b>1.132</b>    |
|                                       | 0.14 - 1.19    | <b>1.231</b>    |
|                                       | 1.19 - 34.02   | <b>0.450</b>    |
| <b>Elevation (m)</b>                  | <2000          | <b>16.614</b>   |
|                                       | 2000 - 2500    | <b>25.370</b>   |
|                                       | 2500 - 3000    | <b>6.448</b>    |
|                                       | 3000 - 3500    | <b>1.582</b>    |
|                                       | 3500 - 4000    | <b>0.223</b>    |
|                                       | 4000 - 4500    | <b>0.162</b>    |
|                                       | 4500 - 5000    | <b>0.030</b>    |
|                                       | 5000 - 5500    | <b>0.000</b>    |
|                                       | > 5500         | <b>0.000</b>    |
| <b>TWI</b>                            | 0.14 - 1.55    | <b>0.646</b>    |
|                                       | 1.55 - 2.26    | <b>0.844</b>    |

|                  |                                                     |        |
|------------------|-----------------------------------------------------|--------|
|                  | 2.26 - 3.20                                         | 1.381  |
|                  | 3.20 - 4.78                                         | 1.734  |
|                  | 4.78 - 15.12                                        | 7.087  |
|                  | Monzonite granite (Group 1)                         | 0.102  |
|                  | Syenite (Group 2)                                   | 0.000  |
|                  | Metamorphic sandstone, phyllite,<br>slate (Group 3) | 1.302  |
|                  | Altered sandstone, slate,<br>limestone (Group 4)    | 0.566  |
| <b>Lithology</b> | Tuffaceous sandstone, siltstone<br>(Group 5)        | 0.915  |
|                  | Volcanic rock, breccia, tuff<br>(Group 6)           | 0.905  |
|                  | Carbonate rocks (Group 7)                           | 0.000  |
|                  | Metamorphic mudstone,<br>sandstone (Group 8)        | 0.216  |
|                  | Clastic rock (Group 9)                              | 1.712  |
|                  | -1 - -0.16                                          | 0.821  |
|                  | -0.16 - -0.01                                       | 1.538  |
| <b>NDVI</b>      | -0.01 - 0.01                                        | 1.357  |
|                  | 0.01 - 0.16                                         | 0.944  |
|                  | 0.16 - 1                                            | 0.763  |
|                  | Farm land                                           | 5.255  |
|                  | Forest land                                         | 0.881  |
| <b>Land use</b>  | Grass land                                          | 0.845  |
|                  | Water                                               | 0.000  |
|                  | Construction land                                   | 63.033 |
|                  | Unused land                                         | 1.028  |
|                  | Brown coniferous forest soils<br>(Group 1)          | 0.116  |
|                  | Brown soil (Group 2)                                | 0.693  |
|                  | Brown subalpine meadow soil<br>(Group 3)            | 0.000  |
|                  | Dry cinnamon soil (Group 4)                         | 2.310  |
|                  | Rock (Group 5)                                      | 0.000  |
| <b>Soil</b>      | Calcareous cinnamon soil (Group<br>6)               | 3.382  |
|                  | Gleyed paddy soil (Group 7)                         | 0.000  |
|                  | Grey cinnamon soil (Group 8)                        | 7.452  |
|                  | Subalpine meadow soil (Group 9)                     | 0.117  |
|                  | Cinnamonic soil (Group 10)                          | 7.174  |
|                  | Alpine frost soil (Group 11)                        | 0.100  |
|                  | Skeletal soil (Group 12)                            | 0.000  |
|                  | Dark brown soil (Group 13)                          | 0.540  |

|                              |          |               |
|------------------------------|----------|---------------|
|                              | <200     | <b>3.150</b>  |
|                              | 200-400  | <b>0.642</b>  |
| <b>Distance to rivers(m)</b> | 400-600  | <b>0.376</b>  |
|                              | 600-800  | <b>0.489</b>  |
|                              | >800     | <b>0.195</b>  |
|                              | <300     | <b>13.737</b> |
|                              | 300-600  | <b>2.502</b>  |
| <b>Distance to roads(m)</b>  | 600-900  | <b>1.802</b>  |
|                              | 900-1200 | <b>0.660</b>  |
|                              | >1200    | <b>0.349</b>  |
